# Supplementary material for: Drug toxicity assessment: cell proliferation versus cell death
Source: PubMed Central journal article supplement (PMC9568594; doi:10.1038/s41420-022-01207-x), 2022-10-14
Supplement: 41420_2022_1207_MOESM1_ESM.pdf [file 41420_2022_1207_MOESM1_ESM.pdf]

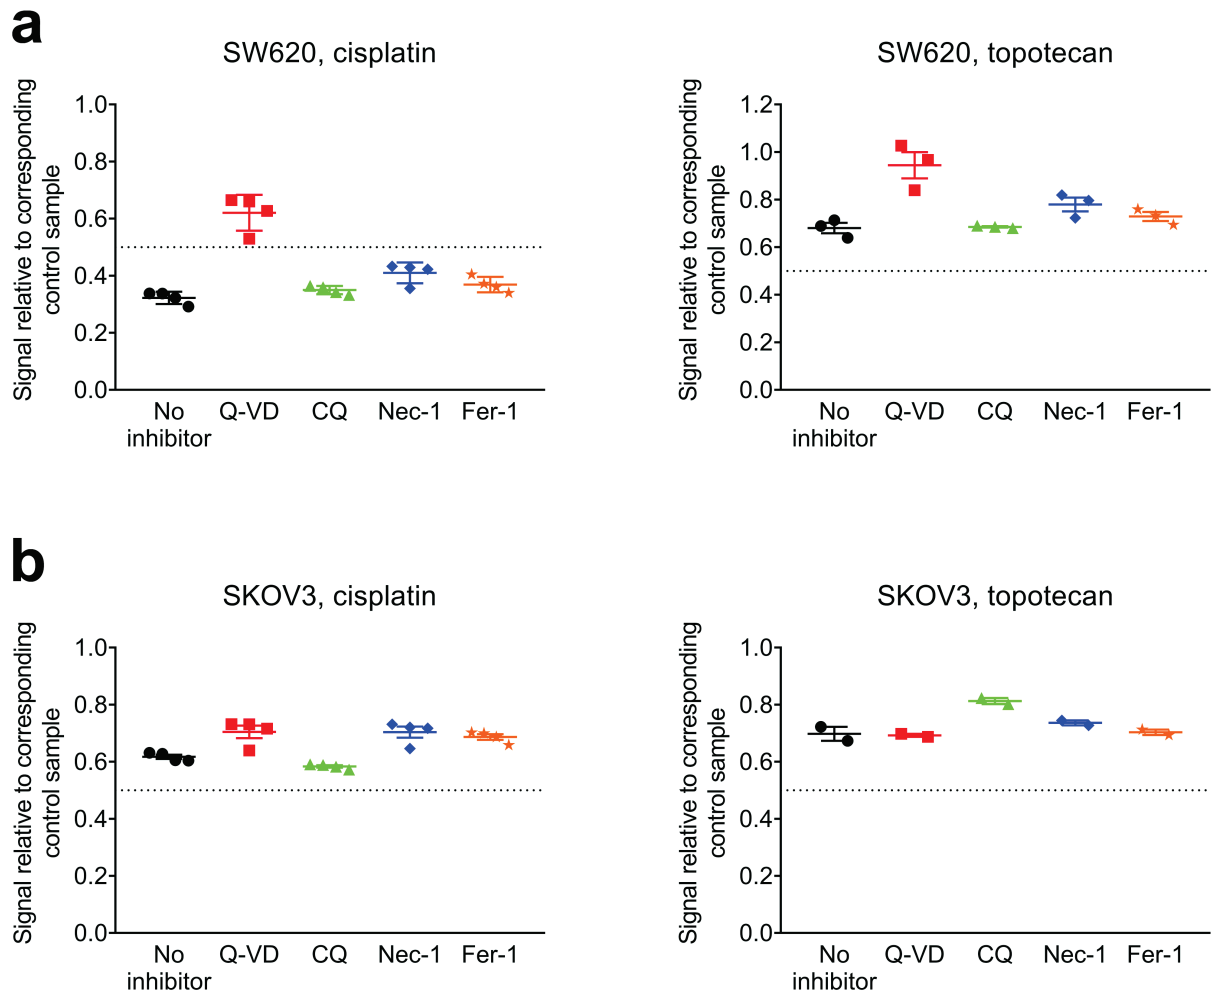

**Supplementary Figure 1. Rescue of viable cell numbers after cisplatin or topotecan treatment in combination with cell death inhibitors.** The cells were treated with cisplatin (5  $\mu$ M for both cell lines) or topotecan (20 nM for SW620, 70 nM for SKOV3) in the combination with 25  $\mu$ M Q-VD, 12.5  $\mu$ M chloroquine (CQ), 20  $\mu$ M necrostatin-1 (Nec-1), or 2.5  $\mu$ M ferrostatin-1 (Fer-1). The MTS assay signal values obtained from SW620 (**a**) or SKOV3 (**b**) cells were normalized to the values obtained from corresponding samples treated with cell death inhibitors only to reflect the relative signal reduction. The lines and whiskers indicate mean  $\pm$  standard error of the mean, N = 4 for cisplatin experiments, N = 3 for SW620 treated with topotecan, N = 2 for SKOV3 treated with topotecan (technical replicates).

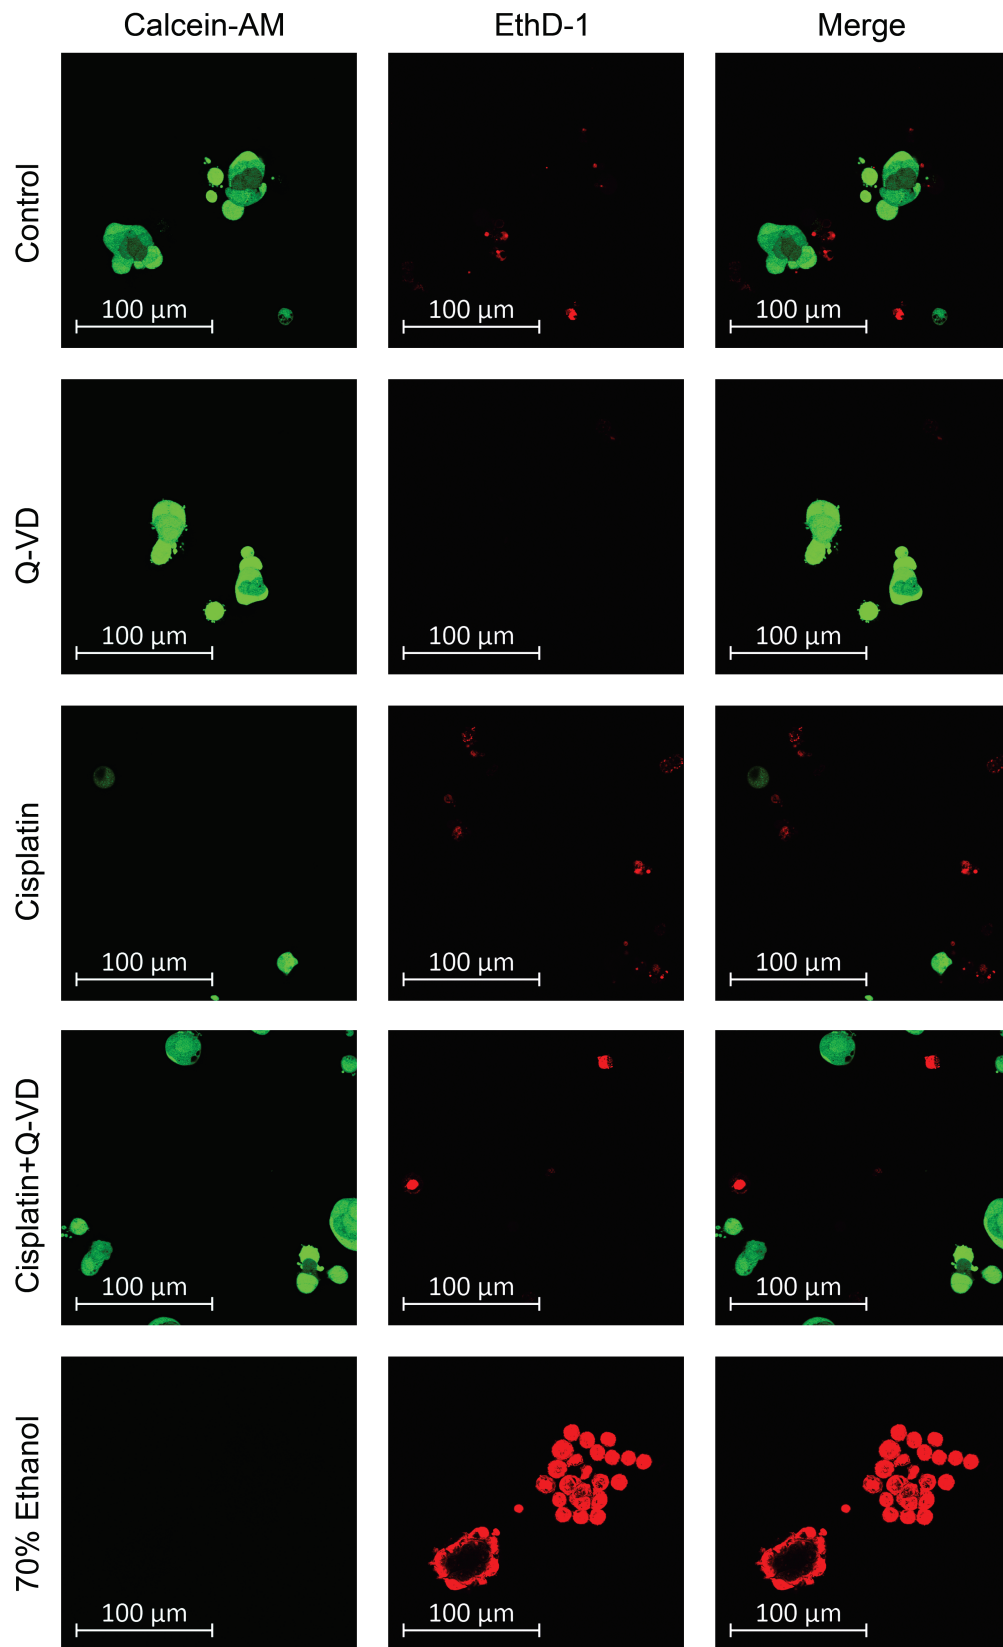

**Supplementary Figure 2. Mutually exclusive staining of viable and dead SW620 cells by LIVE/DEAD assay kit.** The cells were treated with 5  $\mu$ M cisplatin and 25  $\mu$ M of Q-VD or fixed with 70% ethanol and then stained with the LIVE/DEAD kit. The representative images were taken to demonstrate that green calcein-AM dye selectively stains the viable cells, while red EthD-1 dye is only specific to the nuclei of the dead cells.

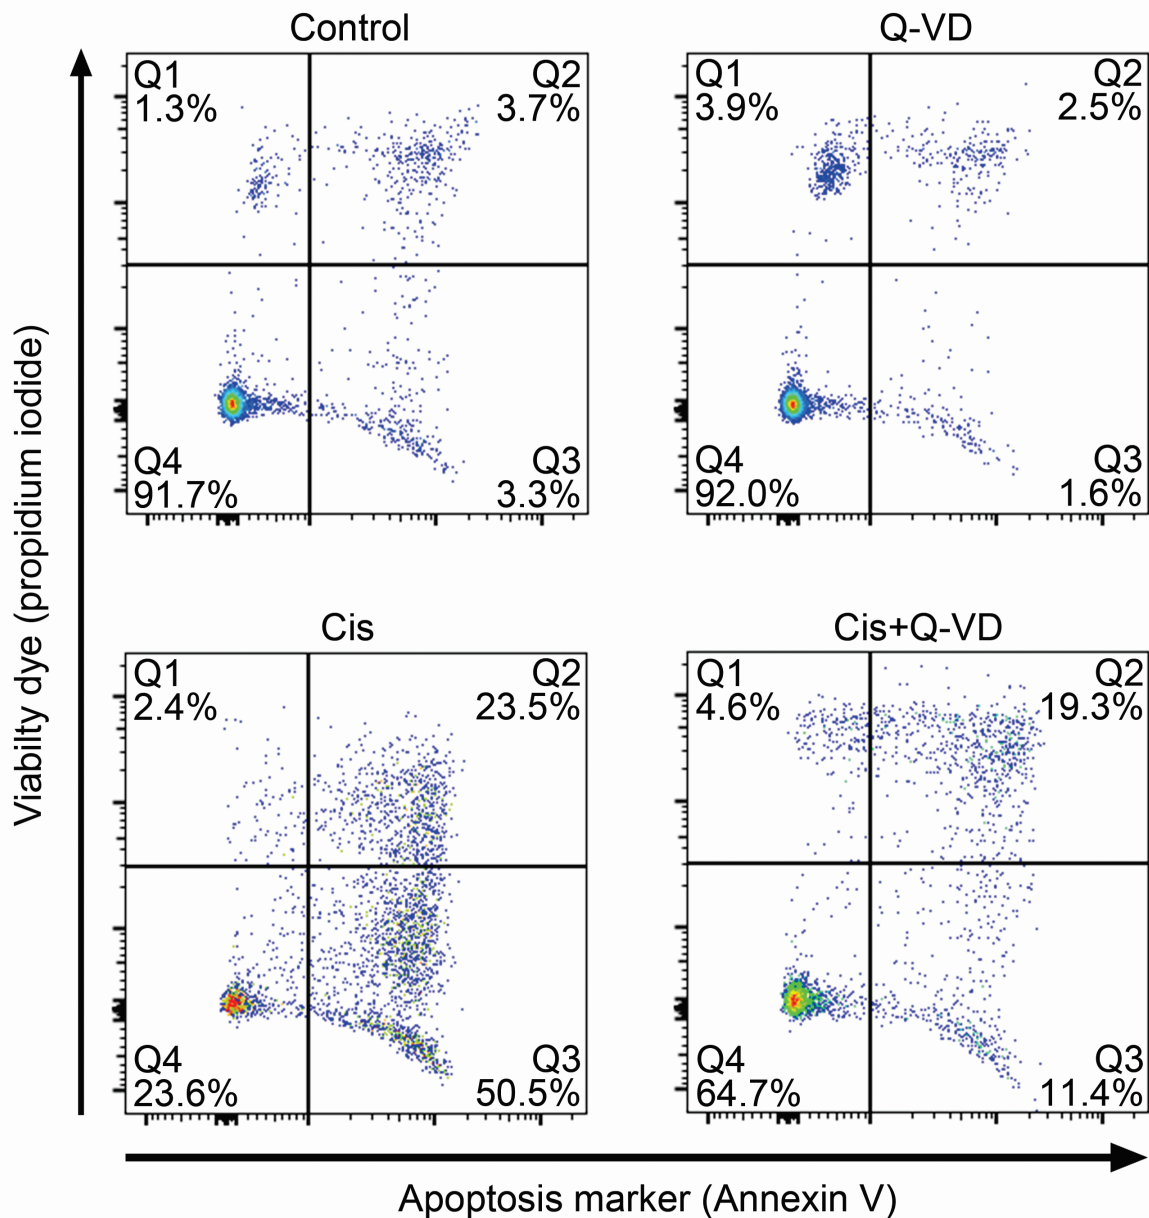

**Supplementary Figure 3. Scatter plot representation of the Annexin V/PI assay results obtained for cisplatin- and Q-VD-treated SW620 cells (Figure 2c).** The numbers correspond to early necrotic (Q1), late apoptotic or completely dead (Q2), early apoptotic (Q3), and viable (Q4) cell fractions. “Contr” – control sample; “Cis” – cisplatin.
