# Supplementary material for: Drug toxicity assessment: cell proliferation versus cell death
Source: PubMed Central journal article supplement (PMC9568594; doi:10.1038/s41420-022-01207-x), 2022-10-14
Supplement: 41420_2022_1207_MOESM2_ESM.pdf [file 41420_2022_1207_MOESM2_ESM.pdf]

Figure 2e:

p-RIPK1 (S166)

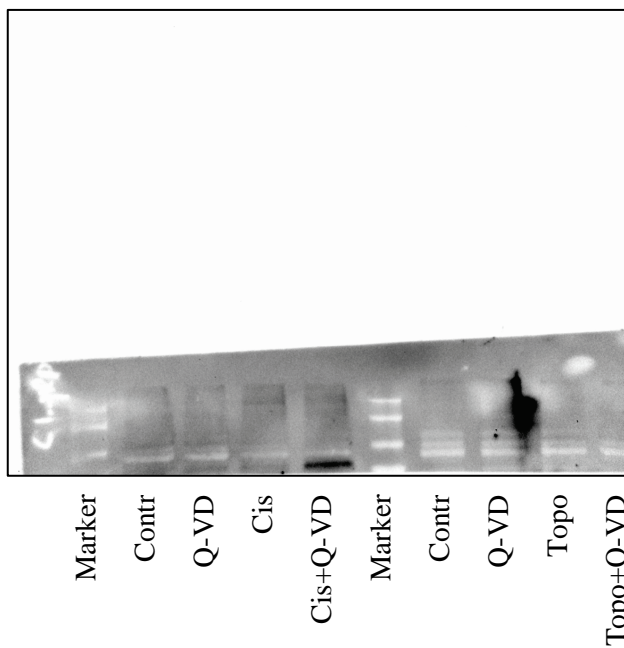

PARP1

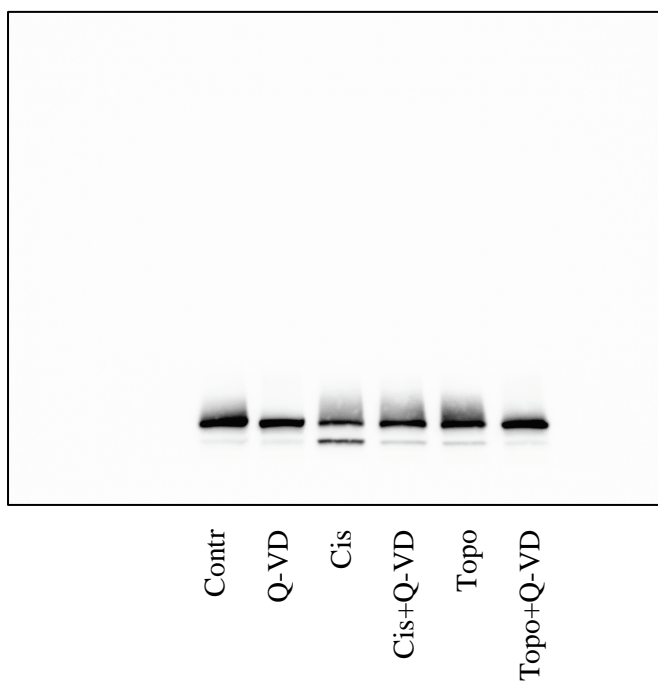

SQSTM1/p62

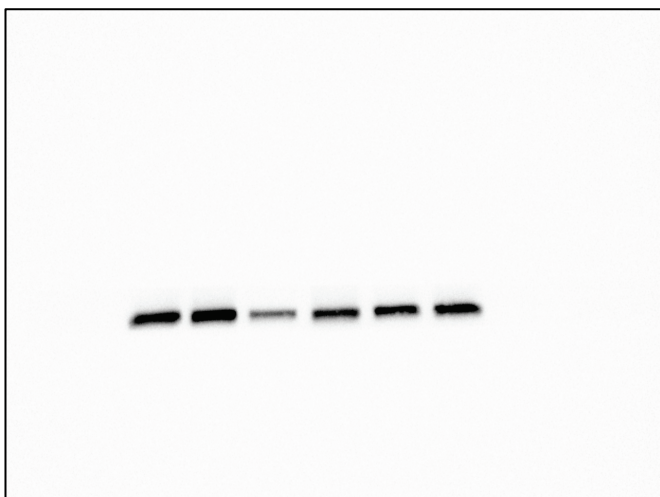

Contr  
Q-VD  
Cis  
Cis+Q-VD  
Topo  
Topo+Q-VD

MAP1LC3B

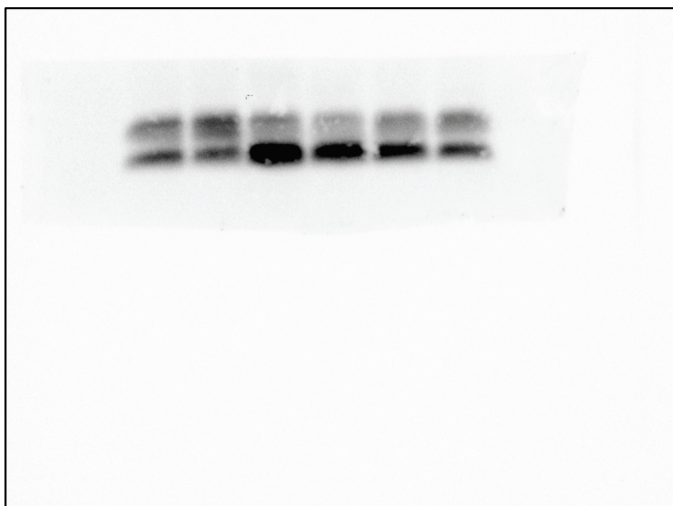

Contr  
Q-VD  
Cis  
Cis+Q-VD  
Topo  
Topo+Q-VD

CASP3

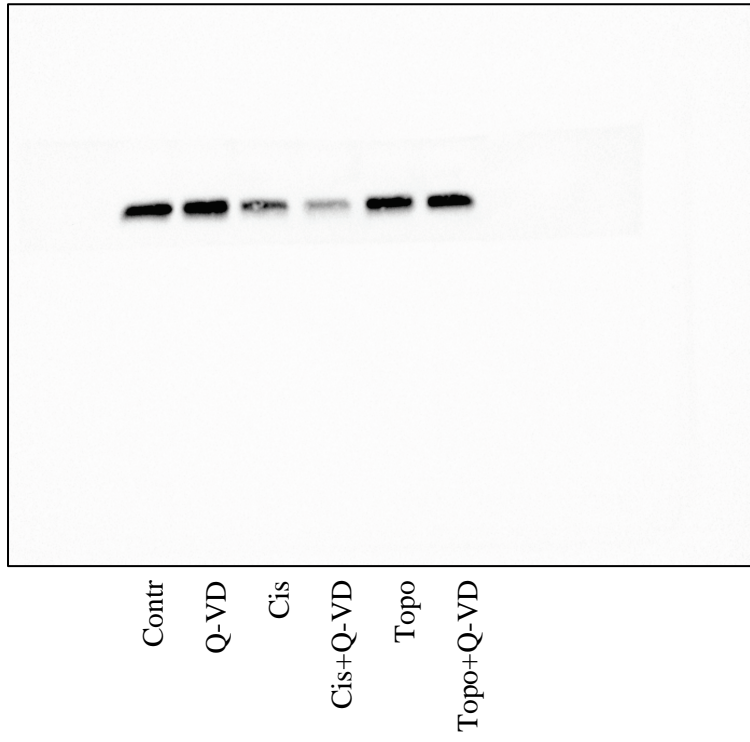

Cleaved CASP3

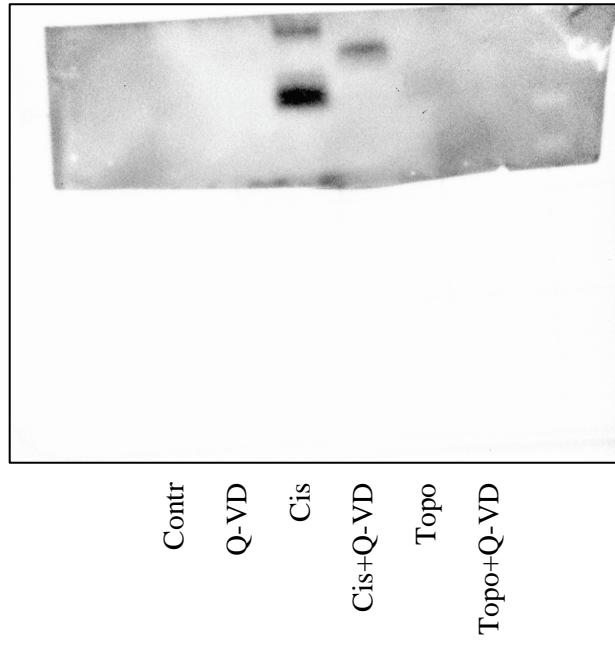

GAPDH

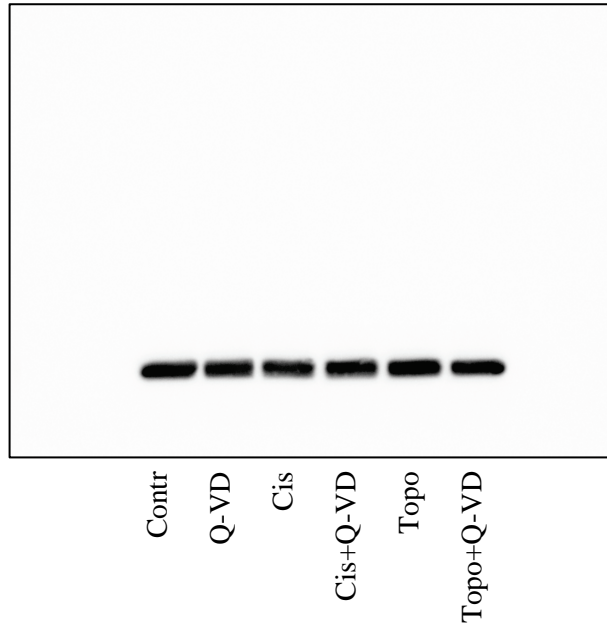



Figure 3d – SW620:

p-RIPK1 (S166)

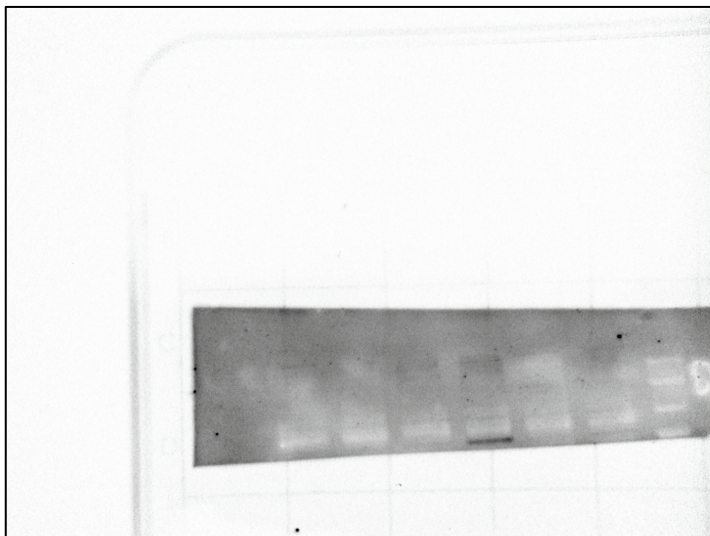

Contr  
Q-VD  
Cis  
Cis+Q-VD  
Topo  
Topo+Q-VD

PARP1

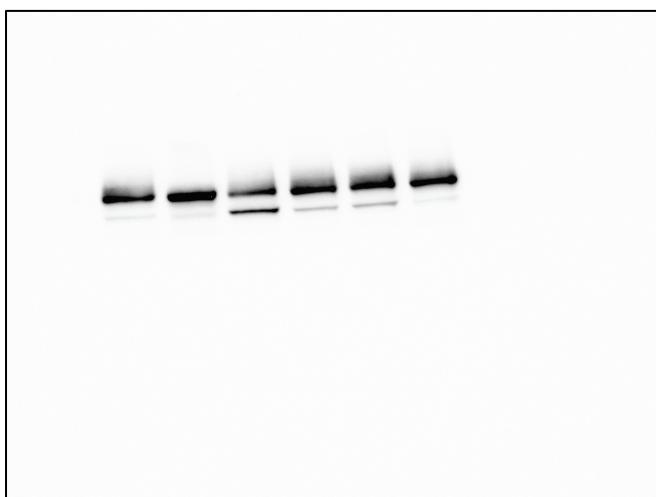

Contr  
Q-VD  
Cis  
Cis+Q-VD  
Topo  
Topo+Q-VD

SQSTM1/p62

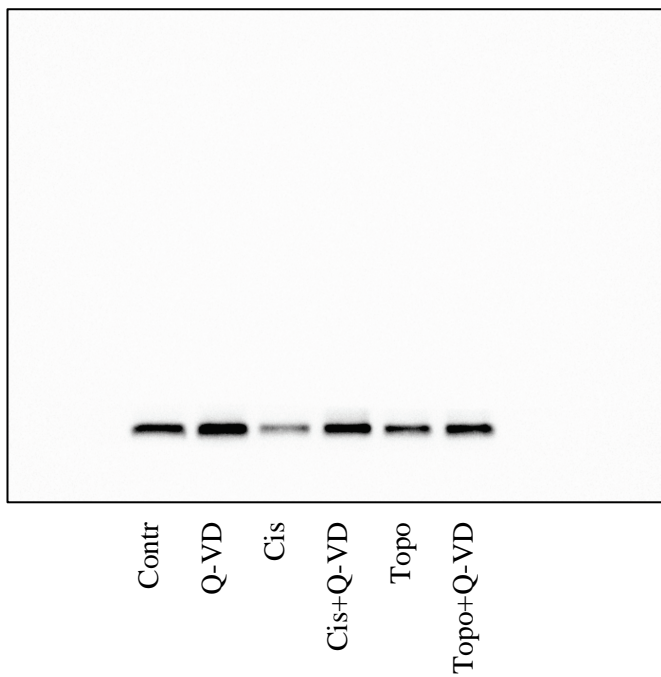

MAP1LC3B

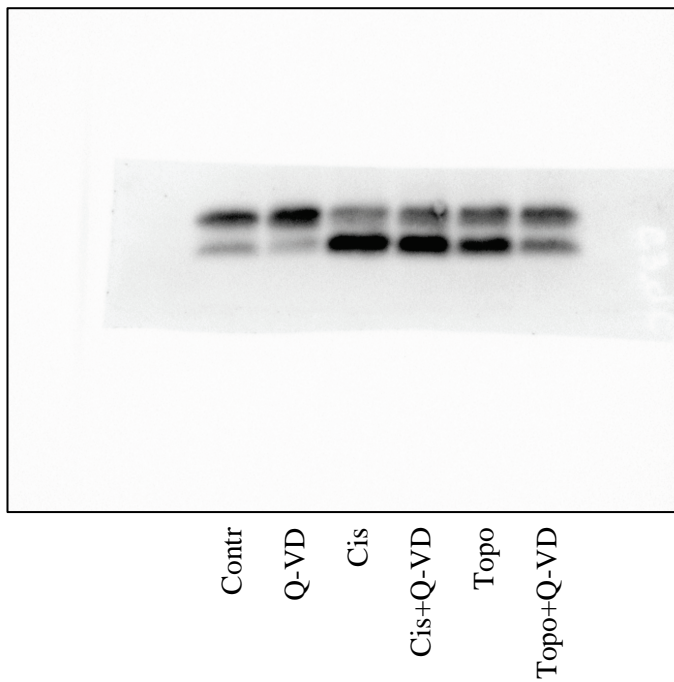

CASP3

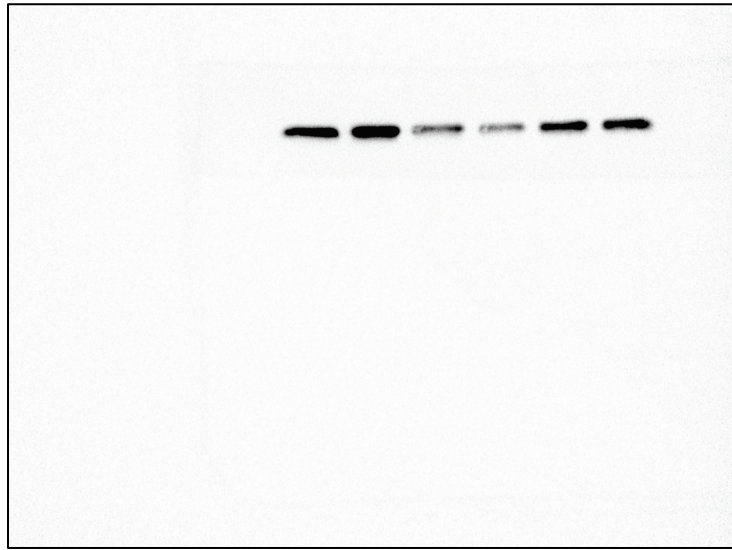

Contr  
Q-VD  
Cis  
Cis+Q-VD  
Topo  
Topo+Q-VD

Cleaved CASP3

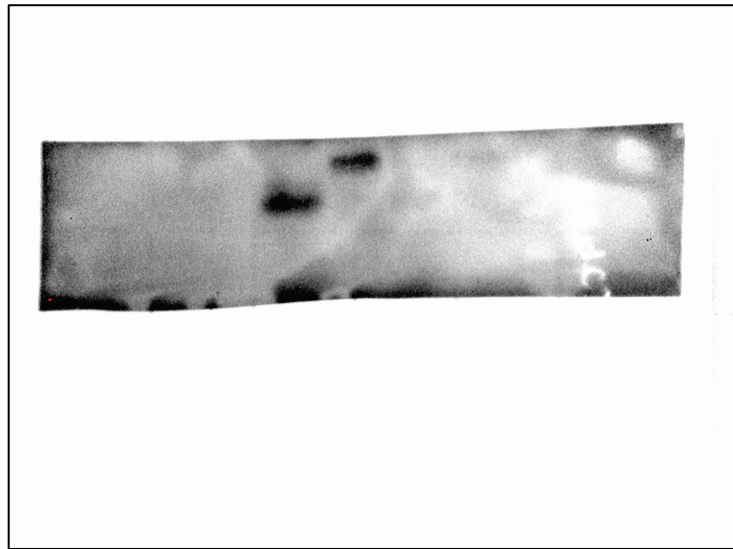

Contr  
Q-VD  
Cis  
Cis+Q-VD  
Topo  
Topo+Q-VD

GAPDH

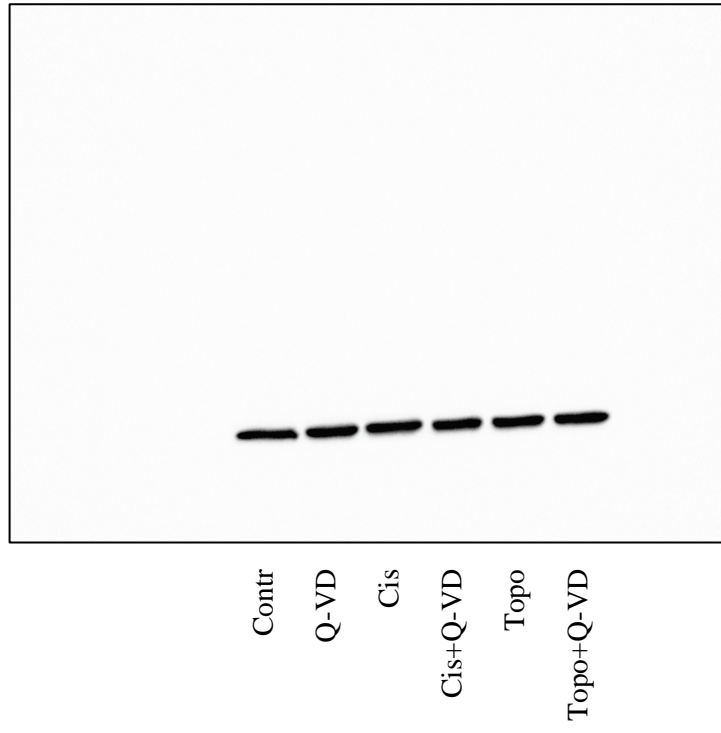

Figure 3d – SKOV3:

p-RIPK1 (S166)

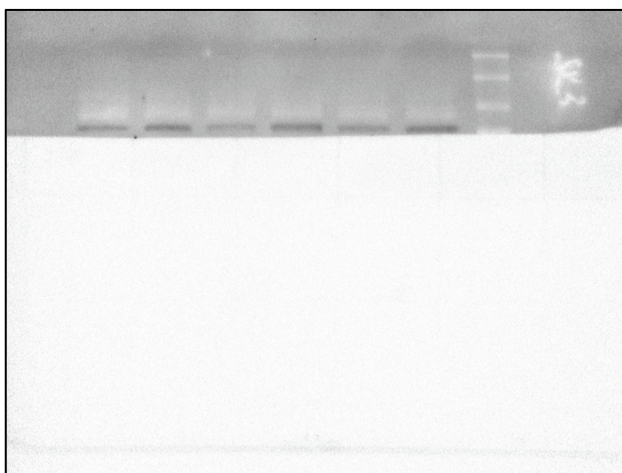

Contr  
Q-VD  
Cis  
Cis+Q-VD  
Topo  
Topo+Q-VD

PARP1

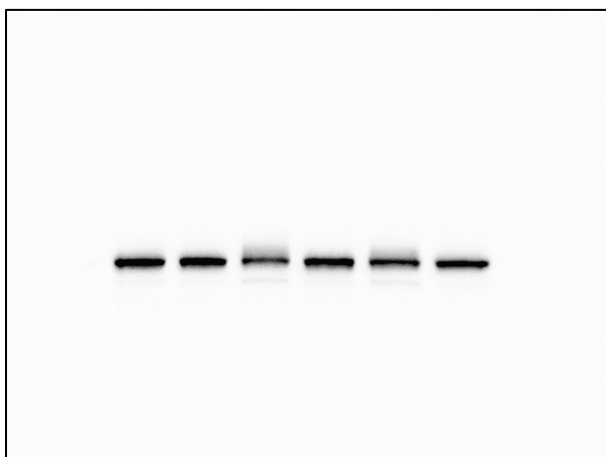

Contr  
Q-VD  
Cis  
Cis+Q-VD  
Topo  
Topo+Q-VD

SQSTM1/p62

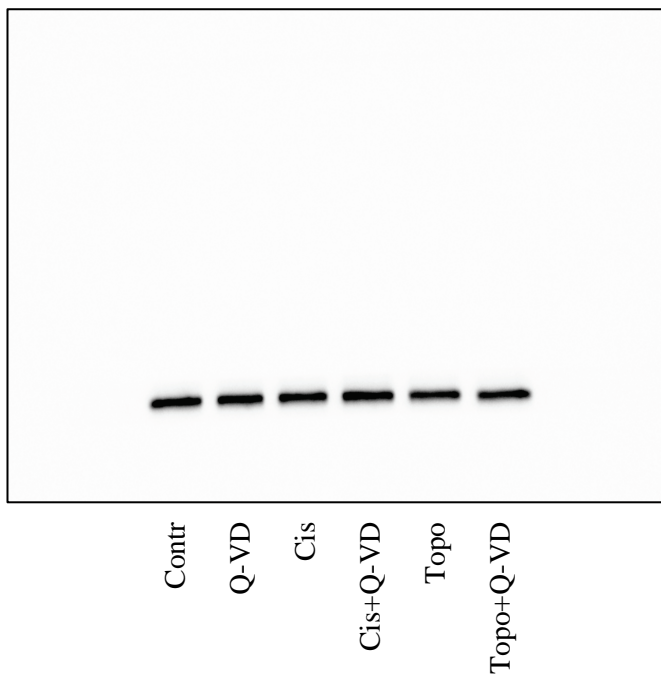

MAP1LC3B

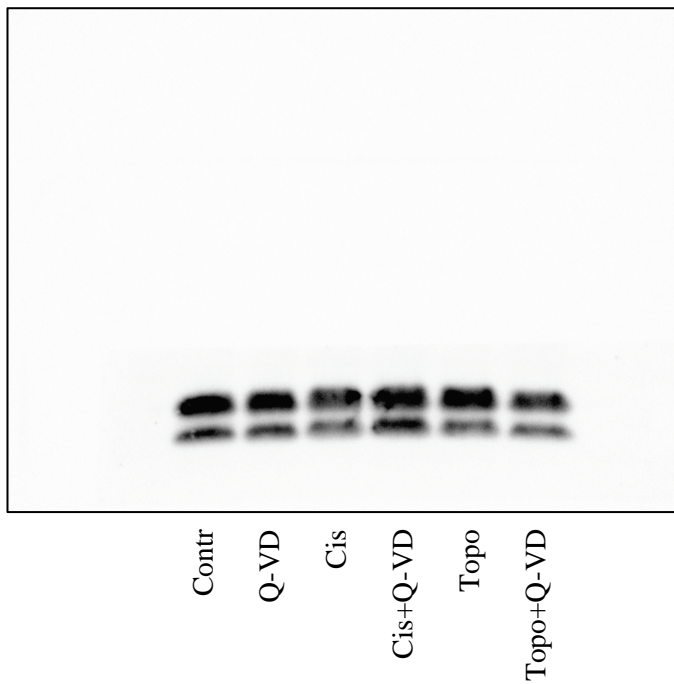

CASP3

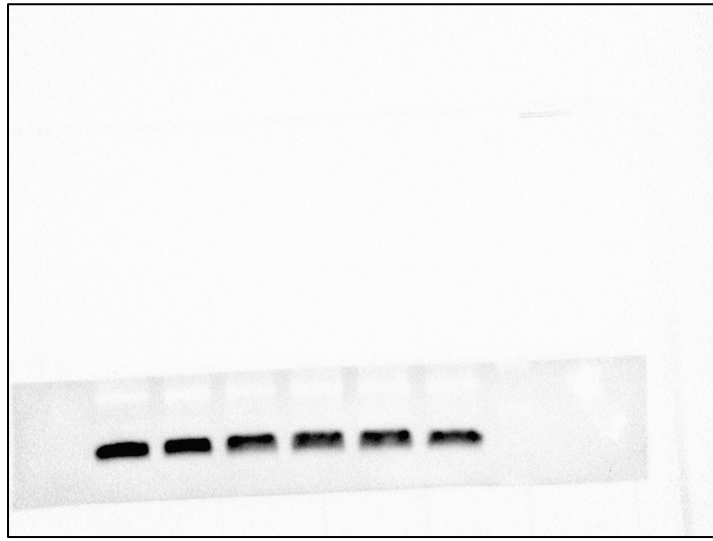

Contr  
Q-VD  
Cis  
Cis+Q-VD  
Topo  
Topo+Q-VD

Cleaved CASP3

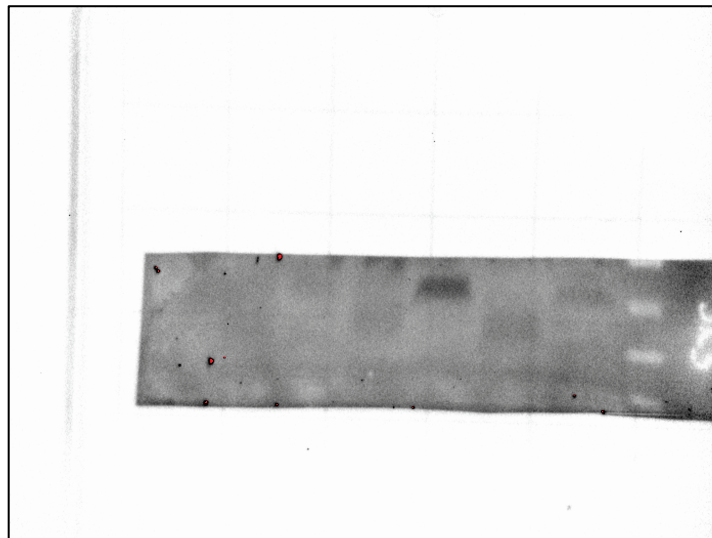

Contr  
Q-VD  
Cis  
Cis+Q-VD  
Topo  
Topo+Q-VD



GAPDH

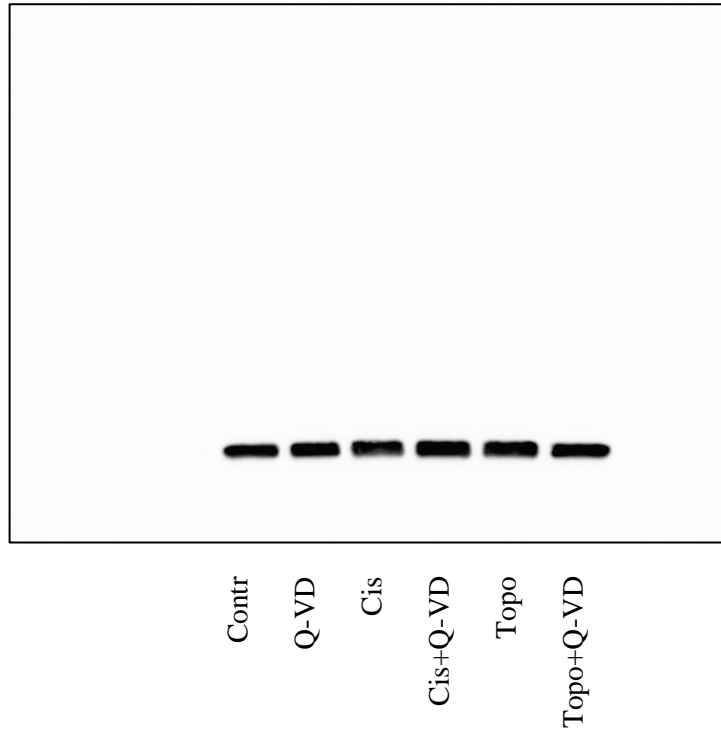



Supplementary Figure 4d:

p-RIPK1 (S166)

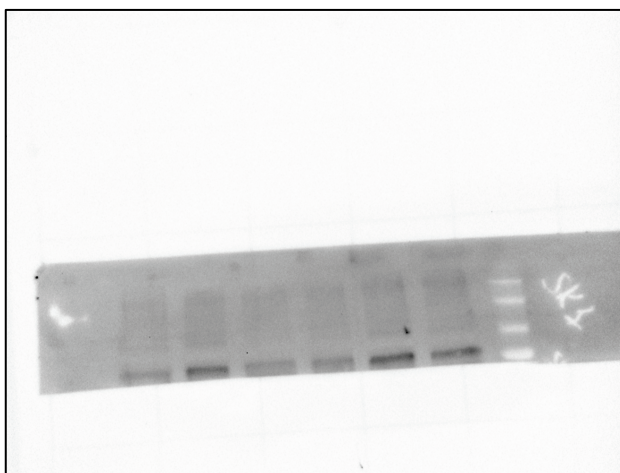

Contr  
Q-VD  
Cis  
Cis+Q-VD  
Topo  
Topo+Q-VD

PARP1

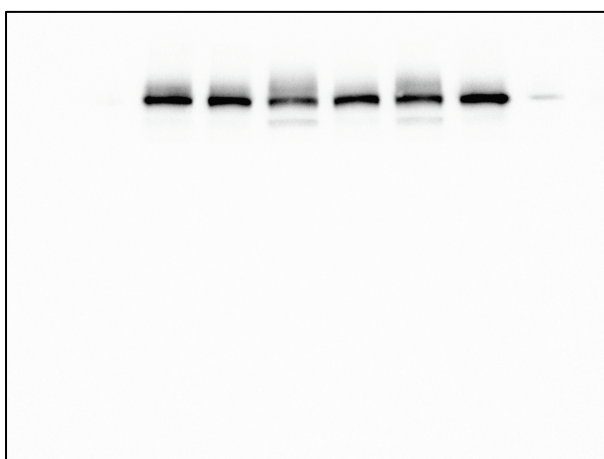

Contr  
Q-VD  
Cis  
Cis+Q-VD  
Topo  
Topo+Q-VD

SQSTM1/p62

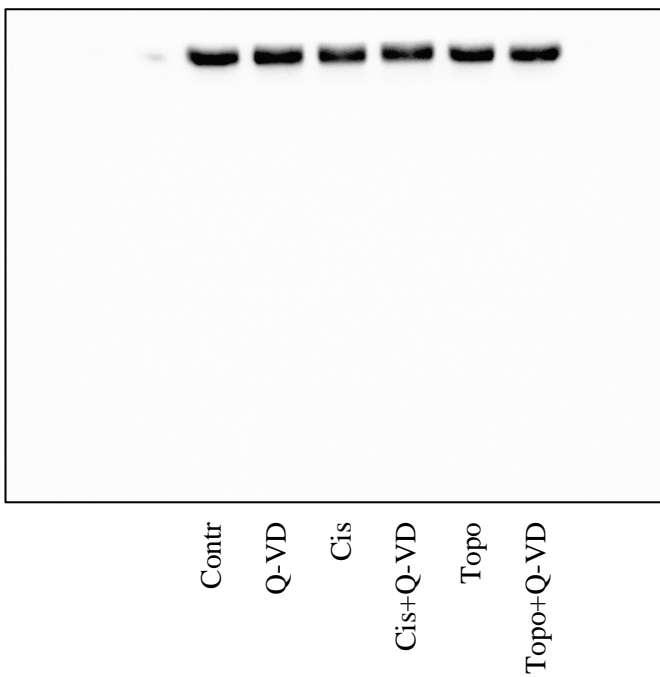

MAP1LC3B

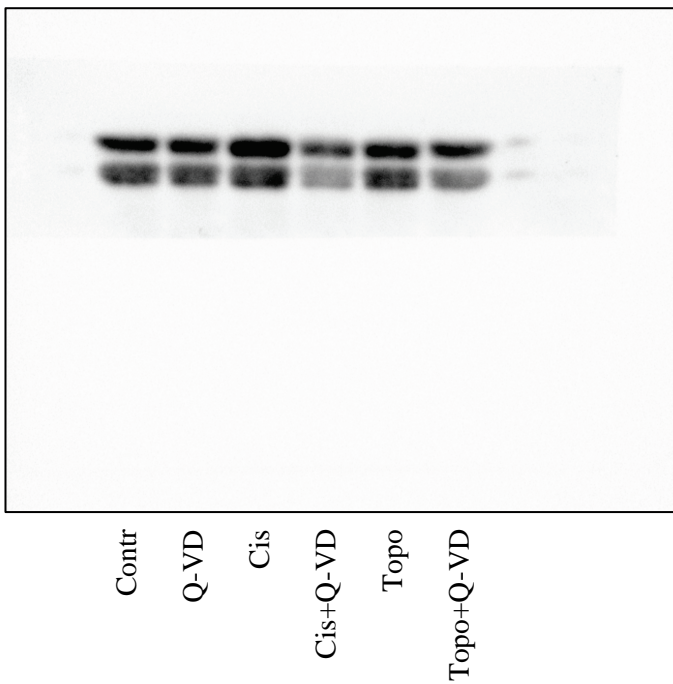

CASP3

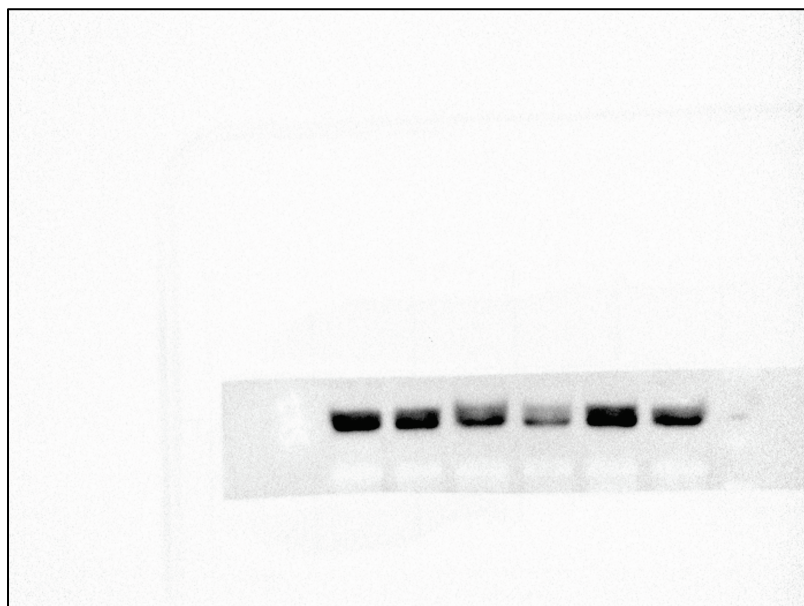

Contr  
Q-VD  
Cis  
Cis+Q-VD  
Topo  
Topo+Q-VD

Cleaved CASP3

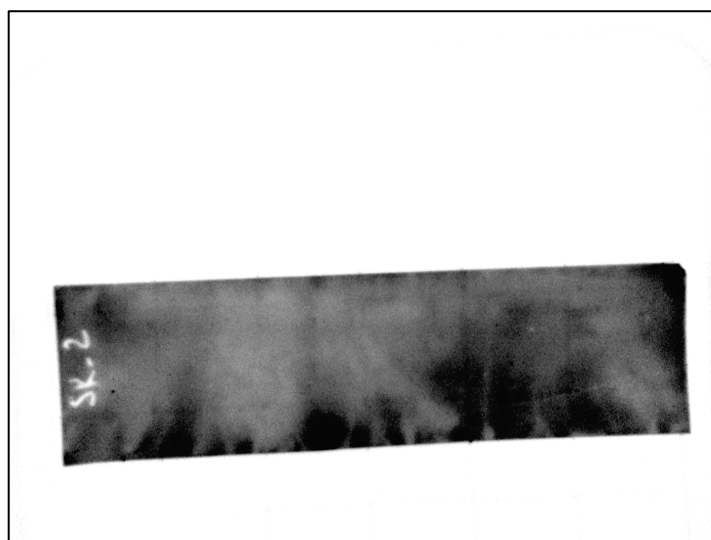

Contr  
Q-VD  
Cis  
Cis+Q-VD  
Topo  
Topo+Q-VD

GAPDH

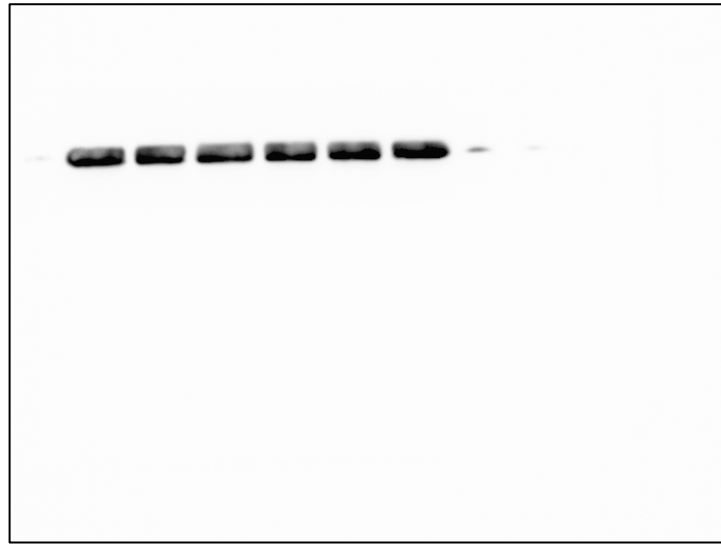

Contr

Q-VD

Cis

Cis+Q-VD

Topo

Topo+Q-VD
